# Supplementary material for: Molecular assembly of alkyl chain-grafted poly(l-lysine) tuned by backbone chain length and grafted alkyl chain
Source: Royal Society of Chemistry journal article supplement (doi:10.1039/c4ra14290j), 2015-01-01
Supplement: c4ra14290j1.pdf [file c4ra14290j1.pdf]

Supporting Information

# Molecular Assembly of Alkyl Chain-Grafted Poly(L-lysine) Tuned by Backbone Chain Length and Grafted Alkyl Chains

*Bo-Yu Chen, Yun-Chiao Huang and Jeng-Shiung Jan\**

Department of Chemical Engineering National Cheng Kung University No 1, University Rd., Tainan,  
Taiwan 70101 (Taiwan)

**Table S1.** Characterization of poly(Z-L-lysine) (PZLL).

| <b>Sample code</b>  | <b>Mn</b> | <b>Mw</b> | <b>PDI</b> |
|---------------------|-----------|-----------|------------|
| PZLL <sub>300</sub> | 79400     | 97800     | 1.23       |
| PZLL <sub>130</sub> | 35600     | 40600     | 1.14       |
| PZLL <sub>60</sub>  | 17400     | 19100     | 1.10       |

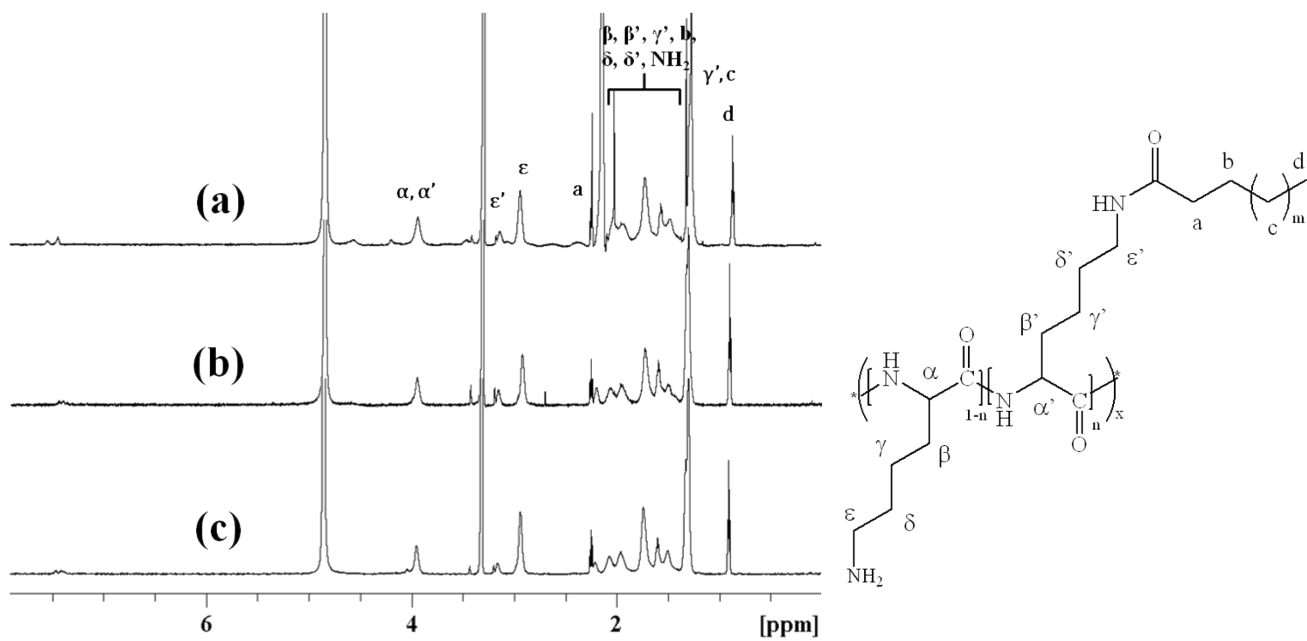

**Figure S1.**  $^1\text{H}$  NMR spectra of (a)  $\text{K}_{60}\text{-g-Dec}_{0.2}$ , (b)  $\text{K}_{60}\text{-g-Dec}_{0.4}$ , and (c)  $\text{K}_{60}\text{-g-Tetra}_{0.2}$  graft copolymers.

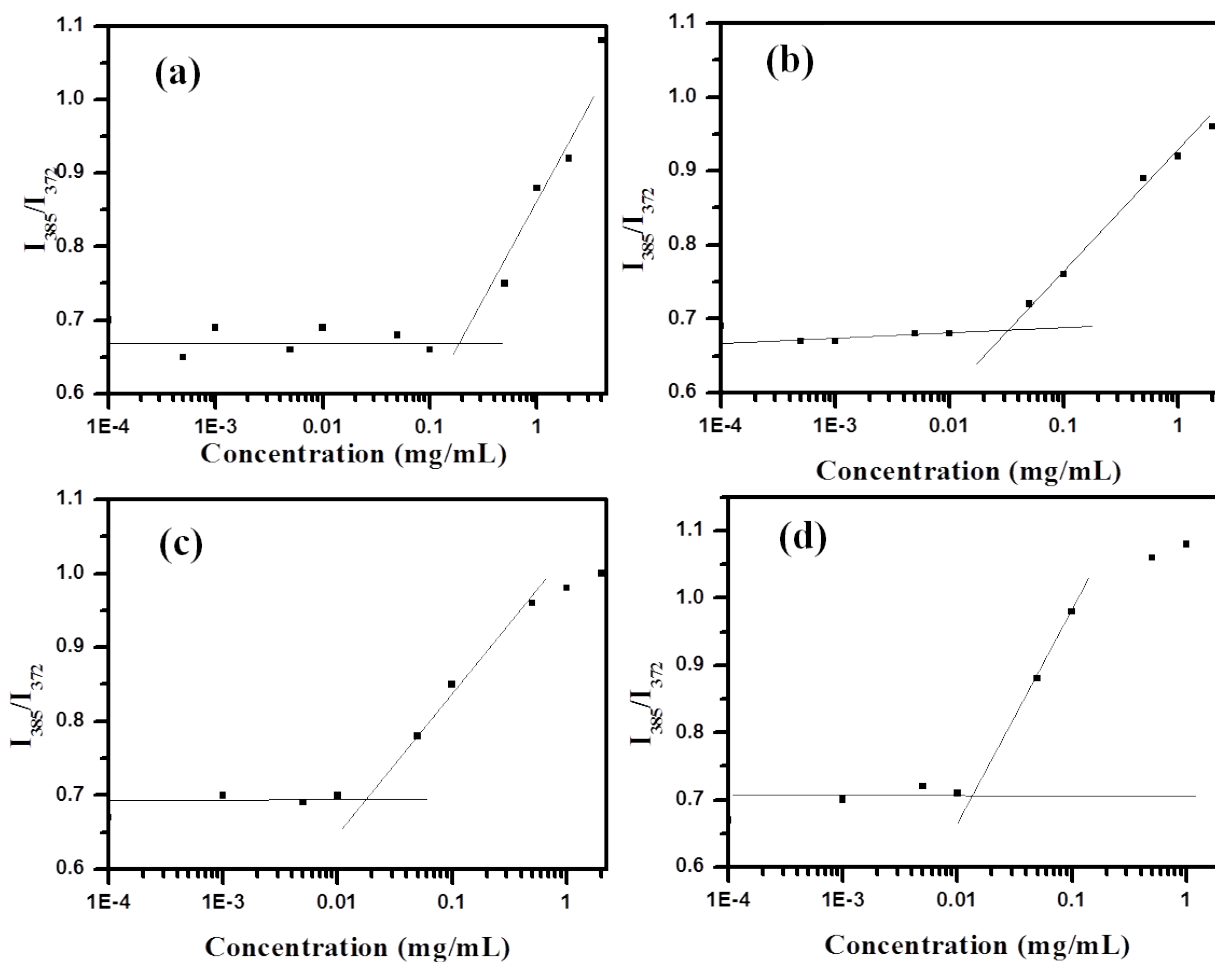

**Figure S2.** The  $I_{385}/I_{372}$  value of pyrene emission of (a)  $K_{130}$ -g-Hexa<sub>0.2</sub>, (b)  $K_{130}$ -g-Dec<sub>0.2</sub>, (c)  $K_{130}$ -g-Dec<sub>0.4</sub>, and (d)  $K_{130}$ -g-Tetra<sub>0.2</sub> as a function of polymer concentration.

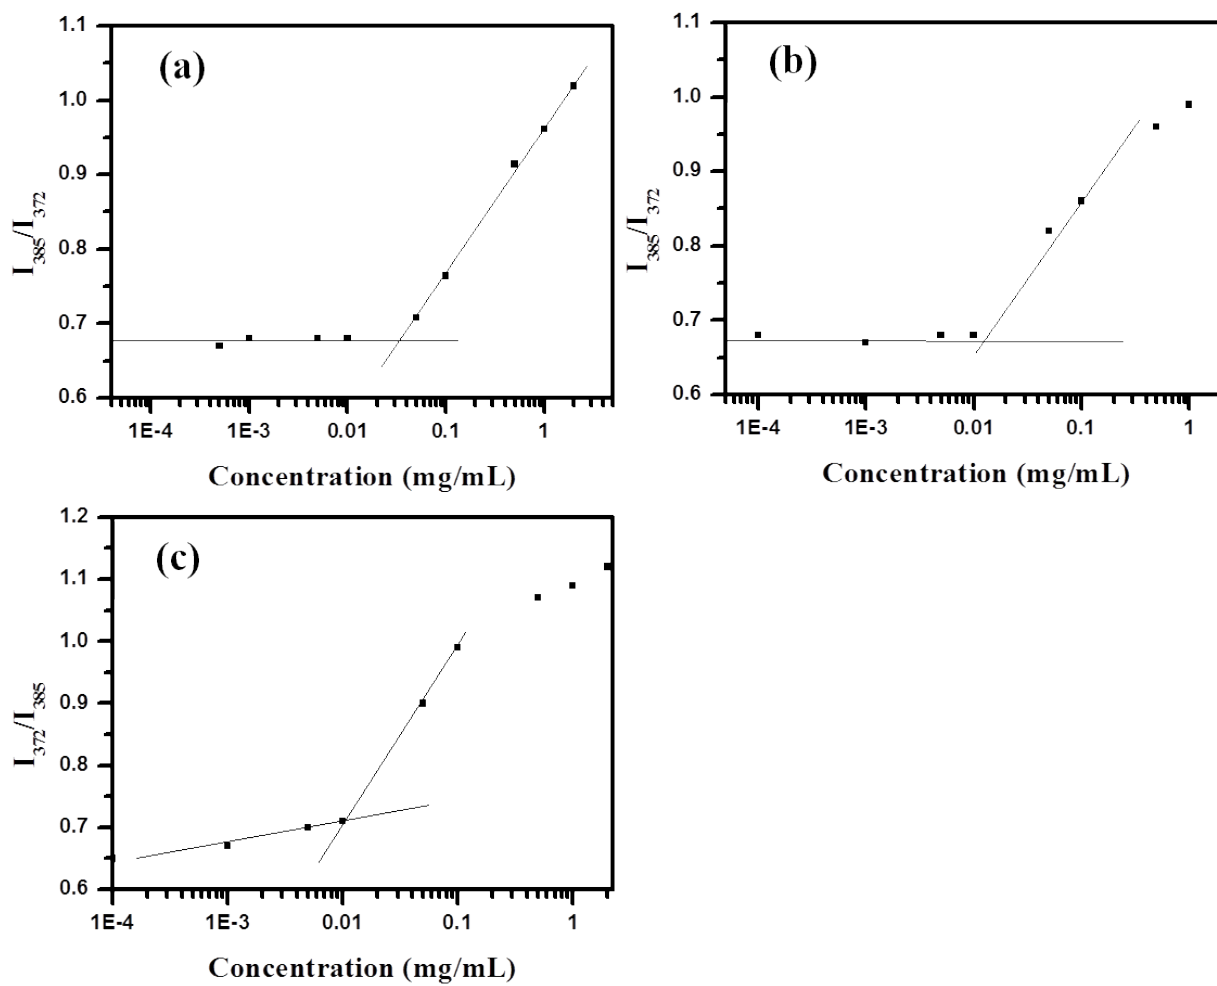

**Figure S3.** The  $I_{385}/I_{372}$  value of pyrene emission of (a)  $K_{60}\text{-g-Dec}_{0.2}$ , (b)  $K_{60}\text{-g-Dec}_{0.4}$ , and (c)  $K_{60}\text{-g-Tetra}_{0.2}$  as a function of polymer concentration.

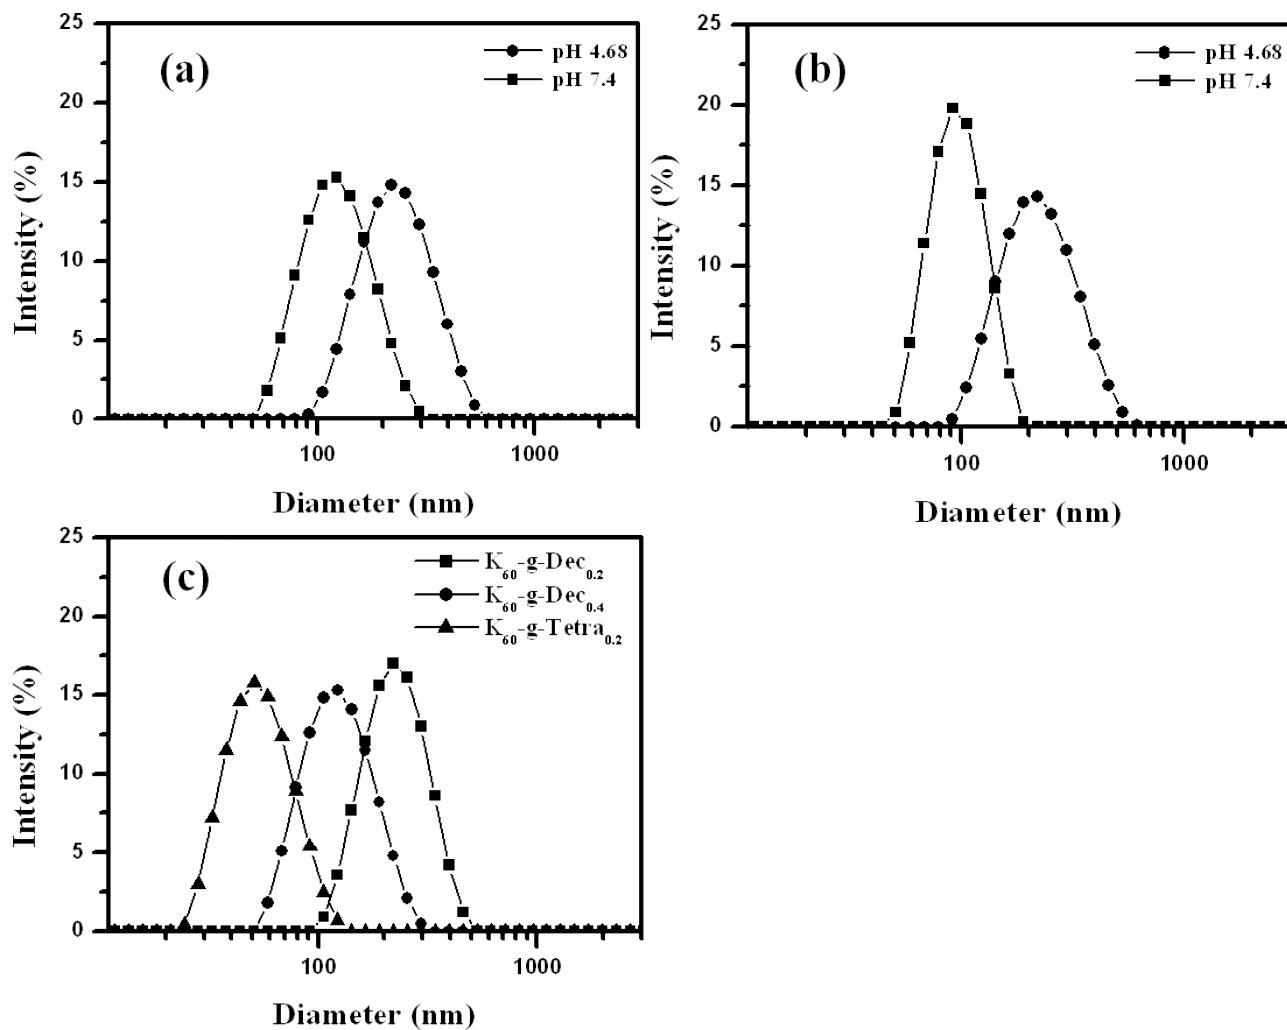

**Figure S4.** Size distributions of (a)  $K_{130}$ -g- $Dec_{0.4}$  and (b)  $K_{60}$ -g- $Dec_{0.4}$  assemblies at pH 4.68 and 7.4, and (c) alkyl chain-grafted  $K_{60}$  assemblies at pH 7.4 ( $I = 0.01$  N).

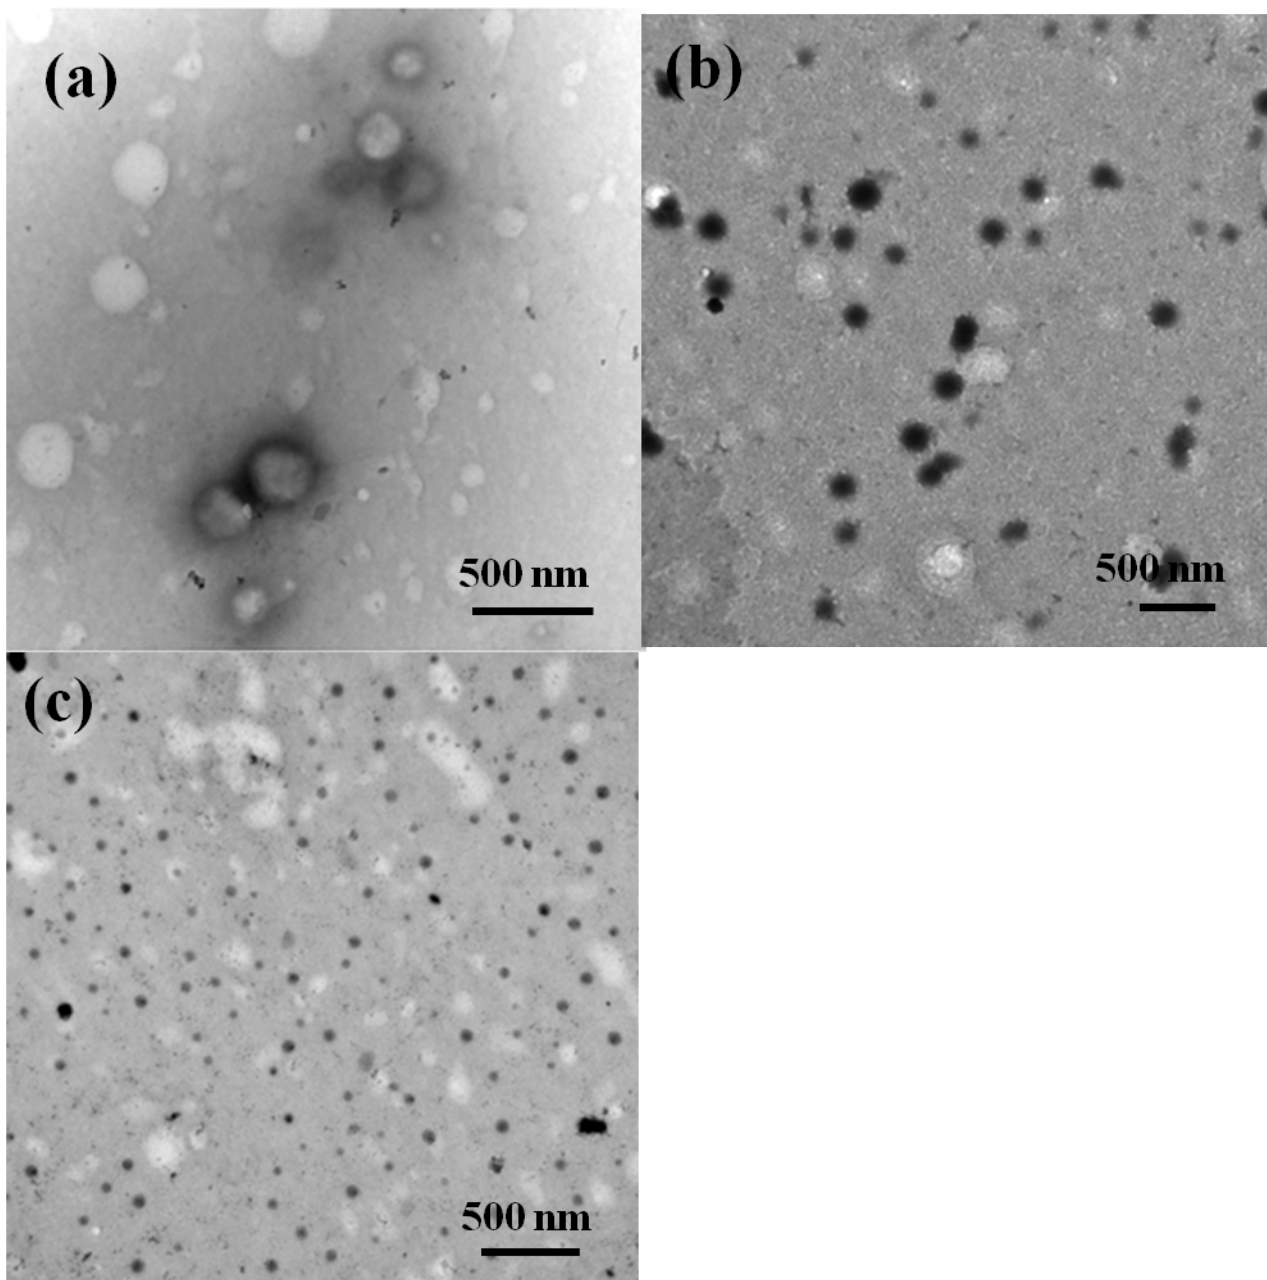

**Figure S5.** TEM images of (a) K<sub>60</sub>-g-Dec<sub>0.2</sub>, (b) K<sub>60</sub>-g-Dec<sub>0.4</sub>, and (c) K<sub>60</sub>-g-Tetra<sub>0.2</sub> assemblies at pH 7.4 (I= 0.01 N).

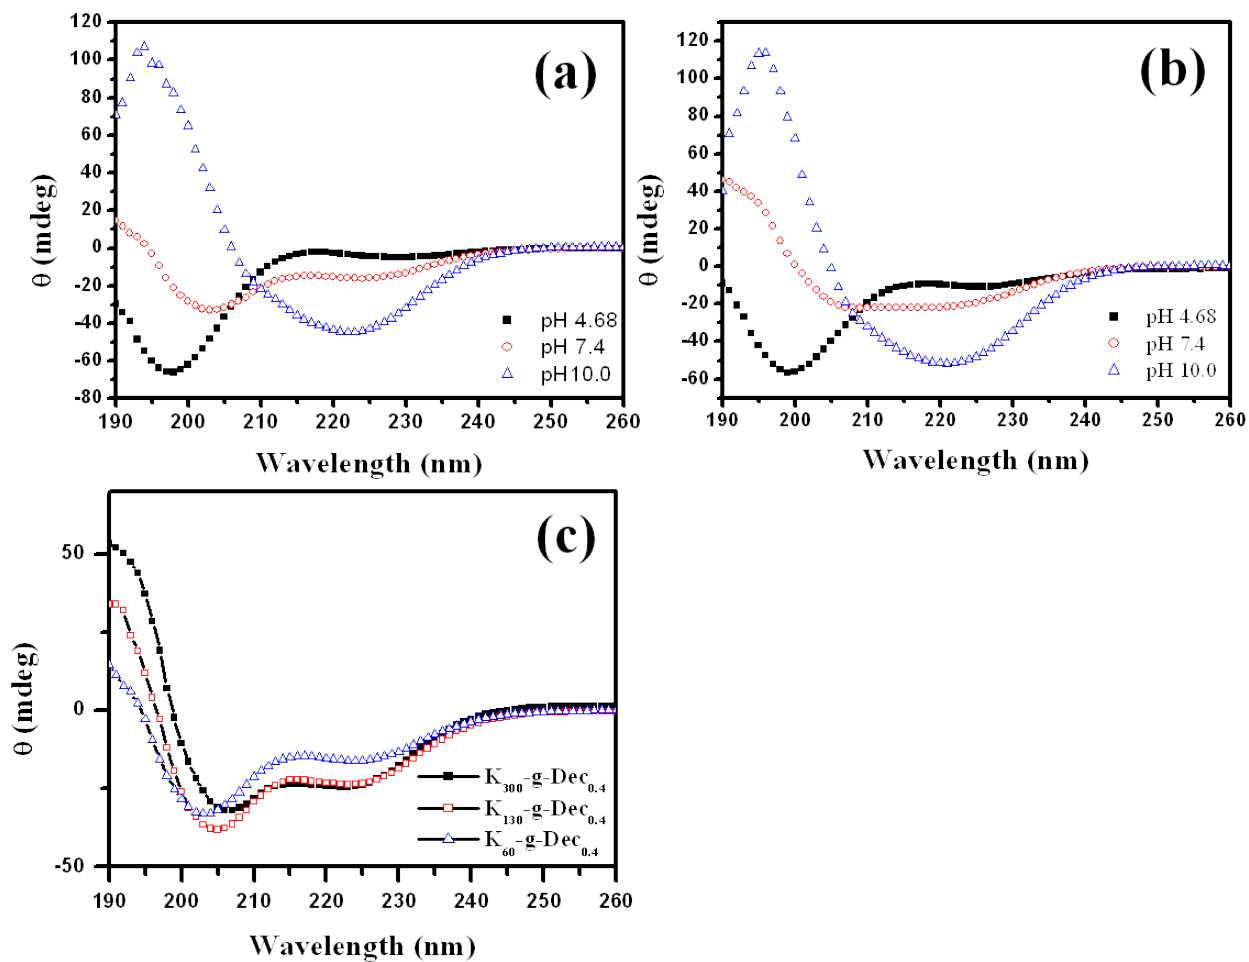

**Figure S6.** CD spectra of (a)  $K_{60}$ -g- $Dec_{0.4}$  and (b)  $K_{60}$ -g- $Tetra_{0.2}$  at different pH values and (c) CD spectra of PLL-g- $Dec_{0.4}$  at pH 7.4 ( $I=0.01$  N)
